# Supplementary material for: Development and validation of a prognostic model of resectable small-cell lung cancer: a large population-based cohort study and external validation
Source: Springer Nature journal article supplement (doi:10.1186/s12967-020-02412-x), 2020-06-15
Supplement: MOESM1 [file 18084514]

Small cell lung cancer  
Data of Diagnosis 2004-2016  
(80011 cases)

Only one primary tumor  
Histological Code 8041-8045  
Diagnosis confirmed by histology  
Surgery performed  
(1485 cases)

Exclusion → 8th TNM stage of M1/N3/Tx/Nx/Mx  
Unknown surgery details  
Unknown data of LNR

Training cohort: 1052 cases

Univariate and Multivariate COX  
Proportional Hazard Regression analysis

Construction of the prognostic model

Construction of a risk stratification model

Creation of a webserver for the nomogram

External validation cohort:  
Shandong Provincial Hospital  
114 cases

Evaluation of the prognostic model:  
Concordance index (C-index)  
Calibration curves  
Decision curve analysis (DCA)  
Integrated discrimination improvement
