# Supplementary material for: Development and validation of a prognostic model of resectable small-cell lung cancer: a large population-based cohort study and external validation
Source: Springer Nature journal article supplement (doi:10.1186/s12967-020-02412-x), 2020-06-15
Supplement: MOESM2 [file 18084514]

## R running of Nomogram for Resected SCLC

This is the R running report of nomogram development and validation of the cohort using R software. (The IASLC validation was conducted by the biostatisticians using the same methods.) Text in blue represents the codes and text in blue represents the corresponding output.

### 1.R code for nomogram:

```
library(rms)
library(foreign)
library(survival)
setwd("C:/R work")

dev<-read.csv("dev.csv")
head(dev)
      id Sex Age T N Surgery LNR Chemotherapy follow death
1  1  1  2  1  1      1  1          2      46      1
2  3  2  2  2  2      1  2          1      20      1
3  4  2  2  3  2      3  2          1      17      1
4  5  2  3  1  1      1  1          2      10      1
5  6  1  2  3  1      1  1          1     103      1
6  7  2  2  2  3      2  2          1      20      1
str(dev)
'data.frame':  1052 obs. of  10 variables:
 $ id      : int  1 3 4 5 6 7 8 9 10 11 ...
 $ Sex     : int  1 2 2 2 1 2 1 2 2 2 ...
 $ Age     : int  2 2 2 3 2 2 3 1 3 3 ...
 $ T       : int  1 2 3 1 3 2 3 3 2 2 ...
 $ N       : int  1 2 2 1 1 3 1 3 1 1 ...
 $ Surgery : int  1 1 3 1 1 2 2 2 1 1 ...
 $ LNR     : int  1 2 2 1 1 2 3 2 1 1 ...
 $ Chemotherapy: int  2 1 1 2 1 1 1 1 2 1 ...
 $ follow  : int  46 20 17 10 103 20 33 28 31 42 ...
 $ death   : int  1 1 1 1 1 1 1 1 1 1 ...
dev$Age<-factor(dev$Age,labels=c('<=60','60-70','>70'))
dev$Sex<-factor(dev$Sex,labels=c('Female','Male'))
dev$Surgery<-factor(dev$Surgery,labels=c('Lobectomy','Sublobectomy','Pneumonectomy'))
dev$T<-factor(dev$T,labels=c('T1','T2','T3-T4'))
dev$N<-factor(dev$N,labels=c('N0','N1','N2'))
dev$LNR<-factor(dev$LNR,labels=c('<=0.01','>0.01','No Lymph Node Resected'))
dev$Chemotherapy<-factor(dev$Chemotherapy,labels=c('Yes','No/Unknown'))

str(dev)
'data.frame':  1052 obs. of  10 variables:
 $ id      : int  1 3 4 5 6 7 8 9 10 11 ...
 $ Sex     : Factor w/ 2 levels "Female","Male": 1 2 2 2 1 2 1 2 2 2 ...
```

```

$ Age      : Factor w/ 3 levels "<=60","60-70",...: 2 2 2 3 2 2 3 1 3 3 ...
$ T        : int   1 2 3 1 3 2 3 3 2 2 ...
$ N        : Factor w/ 3 levels "N0","N1","N2": 1 2 2 1 1 3 1 3 1 1 ...
$ Surgery  : Factor w/ 3 levels "Lobectomy","Sublobar Ectomy",...: 1 1 3 1 1 2 2 2 1 1 ...
$ LNR      : Factor w/ 3 levels "<=0.01",">0.01",...: 1 2 2 1 1 2 3 2 1 1 ...
$ Chemotherapy: Factor w/ 2 levels "Yes","No/Unknown": 2 1 1 2 1 1 1 1 2 1 ...
$ follow   : int   46 20 17 10 103 20 33 28 31 42 ...
$ death    : int   1 1 1 1 1 1 1 1 1 1 ...

```

```

y<-Surv(dev$follow,dev$death==1,type="right")
mod<-coxph(y~Age + Sex + Surgery + T + N + LNR + Chemotherapy, data=dev)
temp <- cox.zph(mod,transform="rank",global=F)
temp

```

|                           | rho      | chisq   | p        |
|---------------------------|----------|---------|----------|
| Age60-70                  | -0.03277 | 0.7162  | 3.97e-01 |
| Age>70                    | -0.02537 | 0.4176  | 5.18e-01 |
| SexMale                   | 0.00537  | 0.0190  | 8.90e-01 |
| SurgerySublobar Ectomy    | 0.01548  | 0.1736  | 6.77e-01 |
| SurgeryPneumonectomy      | -0.02646 | 0.4635  | 4.96e-01 |
| T                         | -0.08378 | 4.8307  | 2.80e-02 |
| NN1                       | -0.03090 | 0.6058  | 4.36e-01 |
| NN2                       | -0.05470 | 1.9656  | 1.61e-01 |
| LNR>0.01                  | 0.01310  | 0.1104  | 7.40e-01 |
| LNRNo Lymph Node Detected | -0.01071 | 0.0829  | 7.73e-01 |
| ChemotherapyNo/Unknown    | -0.24712 | 40.1353 | 2.37e-10 |

```

ddist <- datadist(dev)
options(datadist='ddist')

```

```

units(dev$follow) <- "Month"

```

```

fcox <- cph(Surv(follow,death) ~ Age + Sex + Surgery + T + N + LNR +
Chemotherapy,surv=T,x=T, y=T,data=dev)

```

```

surv <- Survival(fcox)
nom <- nomogram(fcox, fun=list(function(x) surv(12, x),
                             function(x) surv(36, x),
                             function(x) surv(60, x)),
               funlabel=c("1-years Survival Probability",
                           "3-years Survival Probability",
                           "5-years Survival Probability"),lp=F)
plot(nom)

```

```

surv <- Survival(fcox)
nom <- nomogram(fcox, fun=list(function(x) surv(12, x),
                               function(x) surv(36, x),
                               function(x) surv(60, x)),
               funlabel=c("1-years Survival Probability",
                           "3-years Survival Probability",
                           "5-years Survival Probability"),lp=F)
plot(nom,col.grid=c("red","green","blue"))

```

## 2.R code for ROC curve:

```

library(rms)
library(foreign)
library(survival)

setwd("C:/R work")
source("stdca.R")
dev<-read.csv("dev.csv")
head(dev)
str(dev)

dev$Age<-factor(dev$Age,labels=c('<=60','60-70','>70'))
dev$Sex<-factor(dev$Sex,labels=c('Female','Male'))
dev$Surgery<-factor(dev$Surgery,labels=c('Lobectomy','Sublobectomy','Pneumonectomy'))
dev$T<-factor(dev$T,labels=c('T1','T2','T3-T4'))
dev$N<-factor(dev$N,labels=c('N0','N1','N2'))
dev$LNR<-factor(dev$LNR,labels=c('<=0.01','>0.01','No Lymph Node Resected'))
dev$Chemotherapy<-factor(dev$Chemotherapy,labels=c('Yes','No/Unknown'))

str(dev)

library(survivalROC)
nobs<-NROW(dev)
cutoff1<-12
cutoff2<-36
Cutoff3<-60

Srv=Surv(dev$follow,dev$death)

coxmod=coxph(Srv ~ Age + Sex + Surgery + T + N + LNR + Chemotherapy,data=dev)

summary(coxmod)
Call:
coxph(formula = Srv ~ Age + Sex + Surgery + T + N + LNR + Chemotherapy,
      data = dev)

```

n= 1052, number of events= 650

|                           | coef    | exp(coef) | se(coef) | z     | Pr(> z ) |     |
|---------------------------|---------|-----------|----------|-------|----------|-----|
| Age60-70                  | 0.42254 | 1.52584   | 0.10529  | 4.013 | 5.99e-05 | *** |
| Age>70                    | 0.71858 | 2.05152   | 0.10546  | 6.814 | 9.50e-12 | *** |
| SexMale                   | 0.19270 | 1.21252   | 0.07943  | 2.426 | 0.015272 | *   |
| SurgerySublobectomy       | 0.37066 | 1.44869   | 0.09719  | 3.814 | 0.000137 | *** |
| SurgeryPneumonectomy      | 0.45003 | 1.56836   | 0.19603  | 2.296 | 0.021688 | *   |
| TT2                       | 0.22629 | 1.25394   | 0.09228  | 2.452 | 0.014196 | *   |
| TT3-T4                    | 0.70473 | 2.02330   | 0.10704  | 6.584 | 4.59e-11 | *** |
| NN1                       | 0.42896 | 1.53566   | 0.18466  | 2.323 | 0.020182 | *   |
| NN2                       | 0.46019 | 1.58438   | 0.16449  | 2.798 | 0.005148 | **  |
| LNR>0.01                  | 0.27311 | 1.31404   | 0.17979  | 1.519 | 0.128752 |     |
| LNRNo Lymph Node Resected | 0.43604 | 1.54657   | 0.13237  | 3.294 | 0.000987 | *** |
| ChemotherapyNo/Unknown    | 0.42872 | 1.53529   | 0.08883  | 4.826 | 1.39e-06 | *** |

---

Signif. codes: 0 '\*\*\*' 0.001 '\*\*' 0.01 '\*' 0.05 '.' 0.1 ' ' 1

|                           | exp(coef) | exp(-coef) | lower .95 | upper .95 |
|---------------------------|-----------|------------|-----------|-----------|
| Age60-70                  | 1.526     | 0.6554     | 1.2413    | 1.876     |
| Age>70                    | 2.052     | 0.4874     | 1.6684    | 2.523     |
| SexMale                   | 1.213     | 0.8247     | 1.0377    | 1.417     |
| SurgerySublobectomy       | 1.449     | 0.6903     | 1.1974    | 1.753     |
| SurgeryPneumonectomy      | 1.568     | 0.6376     | 1.0680    | 2.303     |
| TT2                       | 1.254     | 0.7975     | 1.0465    | 1.503     |
| TT3-T4                    | 2.023     | 0.4942     | 1.6404    | 2.496     |
| NN1                       | 1.536     | 0.6512     | 1.0693    | 2.205     |
| NN2                       | 1.584     | 0.6312     | 1.1477    | 2.187     |
| LNR>0.01                  | 1.314     | 0.7610     | 0.9238    | 1.869     |
| LNRNo Lymph Node Resected | 1.547     | 0.6466     | 1.1932    | 2.005     |
| ChemotherapyNo/Unknown    | 1.535     | 0.6513     | 1.2900    | 1.827     |

Concordance= 0.669 (se = 0.012 )

Likelihood ratio test= 212.1 on 12 df, p=<2e-16

Wald test = 208.2 on 12 df, p=<2e-16

Score (logrank) test = 217.1 on 12 df, p=<2e-16

```
Sexn<- as.numeric(dev$Sex)
```

```
dev$sexpoint<- ifelse(Sexn==1,0,0.19270)
```

```
Agen<- as.numeric(dev$Age)
```

```
dev$agepoint<- ifelse(Agen==1,0,ifelse(Agen==2,0.42254,0.71858))
```

```

Surgeryn<- as.numeric(dev$Surgery)
dev$surgerypoint<- ifelse(Surgeryn==1,0,ifelse(Surgeryn==2,0.37066,0.45003))

Tn<- as.numeric(dev$T)
dev$tpoint<- ifelse(Tn==1,0,ifelse(Tn==2,0.22629,0.70473))

Nn<- as.numeric(dev$N)
dev$npoint<- ifelse(Nn==1,0,ifelse(Nn==2,0.42896,0.46019))

LNRn<- as.numeric(dev$LNR)
dev$lnrpoint<- ifelse(LNRn==1,0,ifelse(LNRn==2,0.27311,0.43604))

Chemotherapy<- as.numeric(dev$Chemotherapy)
dev$chemotherapypoint<- ifelse(Chemotherapy==1,0,0.42872)

dev$PI<-dev$points<-rowSums(dev[,c("agepoint", "sexpoint", "surgerypoint", "lnrpoint", "tpoint", "n
point", "chemotherapypoint")])

data<-dev[which(dev$death!="NA"),]

write.csv(dev, "devnew.csv")

SROC= survivalROC(Stime = data$follow, status = data$death, marker = data$PI, predict.time
=cutoff1, method= "KM" )
cut.op= SROC$cut.values[which.max(SROC$TP-SROC$FP)]
cut.op
[1] 1.68211
plot(SROC$FP,SROC$TP, type="l", xlim=c(0,1), ylim=c(0,1),
      xlab = paste( "FP","\n", "AUC = ",round(SROC$AUC,3)),
      ylab = "TP", col="red")
abline(0,1)
legend("bottomright",c("One Year Survival Probability PI"),col="red",lty=c(1,1))

SROC= survivalROC(Stime = data$follow, status = data$death, marker = data$PI, predict.time
=cutoff2, method= "KM" )
cut.op= SROC$cut.values[which.max(SROC$TP-SROC$FP)]
cut.op
[1] 1.1521
plot(SROC$FP,SROC$TP, type="l", xlim=c(0,1), ylim=c(0,1),
      xlab = paste( "FP","\n", "AUC = ",round(SROC$AUC,3)),
      ylab = "TP", col="red")
abline(0,1)
legend("bottomright",c("Three Year Survival Probability PI "),col="red",lty=c(1,1))

```

```

SROC= survivalROC(Stime = data$follow, status = data$death, marker = data$PI, predict.time
=cutoff3, method= "KM" )
cut.op= SROC$cut.values[which.max(SROC$TP-SROC$FP)]
cut.op
[1] 1.43803
plot(SROC$FP,SROC$TP, type="l", xlim=c(0,1), ylim=c(0,1),
      xlab = paste( "FP","\n", "AUC = ",round(SROC$AUC,3)),
      ylab = "TP", col="red")
abline(0,1)
legend("bottomright",c("Five Year Survival Probability PI "),col="red",lty=c(1,1))

```

```

library(rms)
library(foreign)
library(survival)

```

```

setwd("C:/R work")
source("stdca.R")
vad<-read.csv("vad.csv")
head(vad)
str(vad)

```

```

vad$Age<-factor(vad$Age,labels=c('<=60','60-70','>70'))
vad$Sex<-factor(vad$Sex,labels=c('Female','Male'))
vad$Surgery<-factor(vad$Surgery,labels=c('Lobectomy','Sublobectomy','Pneumonectomy'))
vad$T<-factor(vad$T,labels=c('T1','T2','T3-T4'))
vad$N<-factor(vad$N,labels=c('N0','N1','N2'))
vad$LNR<-factor(vad$LNR,labels=c('<=0.01','>0.01','No Lymph Node Resected'))
vad$Chemotherapy<-factor(vad$Chemotherapy,labels=c('Yes','No/Unknown'))

```

```
str(vad)
```

```

library(survivalROC)
nobs<-NROW(vad)
cutoff1<-12
cutoff2<-36
Cutoff3<-60

```

```
Srv=Surv(vad$follow,vad$death)
```

```
coxmod=coxph(Srv ~ Age + Sex + Surgery + T + N + LNR + Chemotherapy,data=vad)
```

```

Sexn<- as.numeric(vad$Sex)
vad$sexpoint<- ifelse(Sexn==1,0,0.19270)

```

```

Agen<- as.numeric(vad$Age)
vad$agepoint<- ifelse(Agen==1,0,ifelse(Agen==2,0.42254,0.71858))

Surgeryn<- as.numeric(vad$Surgery)
vad$surgerypoint<- ifelse(Surgeryn==1,0,ifelse(Surgeryn==2,0.37066,0.45003))

Tn<- as.numeric(vad$T)
vad$tpoint<- ifelse(Tn==1,0,ifelse(Tn==2,0.22629,0.70473))

Nn<- as.numeric(vad$N)
vad$npoint<- ifelse(Nn==1,0,ifelse(Nn==2,0.42896,0.46019))

LNRn<- as.numeric(vad$LNR)
vad$lnrpoint<- ifelse(LNRn==1,0,ifelse(LNRn==2,0.27311,0.43604))

Chemotherapyn<- as.numeric(vad$Chemotherapy)
vad$chemotherapypoint<- ifelse(Chemotherapyn==1,0,0.42872)

vad$PI<-vad$points<-rowSums(vad[,c("agepoint","sexpoint","surgerypoint","lnrpoint","tpoint","n
point","chemotherapypoint")])

data<-vad[which(vad$death!="NA"),]

write.csv(vad, "vadnew.csv")

SROC= survivalROC(Stime = data$follow, status = data$death, marker = data$PI, predict.time
=cutoff1, method= "KM" )
cut.op= SROC$cut.values[which.max(SROC$TP-SROC$FP)]
cut.op
[1] 1.7835
plot(SROC$FP,SROC$TP, type="l", xlim=c(0,1), ylim=c(0,1),
      xlab = paste( "FP","\n", "AUC = ",round(SROC$AUC,3)),
      ylab = "TP", col="red")
abline(0,1)
legend("bottomright",c("One Year Survival Probability PI"),col="red",lty=c(1,1))

SROC= survivalROC(Stime = data$follow, status = data$death, marker = data$PI, predict.time
=cutoff2, method= "KM" )
cut.op= SROC$cut.values[which.max(SROC$TP-SROC$FP)]
cut.op
[1] 1.61335
plot(SROC$FP,SROC$TP, type="l", xlim=c(0,1), ylim=c(0,1),
      xlab = paste( "FP","\n", "AUC = ",round(SROC$AUC,3)),

```

```

      ylab = "TP", col="red")
abline(0,1)
legend("bottomright",c("Three Year Survival Probability PI "),col="red",lty=c(1,1))

SROC= survivalROC(Stime = data$follow, status = data$death, marker = data$PI, predict.time
=cutoff3, method= "KM" )
cut.op= SROC$cut.values[which.max(SROC$TP-SROC$FP)]
cut.op
[1] 1.61335
plot(SROC$FP,SROC$TP, type="l", xlim=c(0,1), ylim=c(0,1),
      xlab = paste( "FP", "\n", "AUC = ",round(SROC$AUC,3)),
      ylab = "TP", col="red")
abline(0,1)
legend("bottomright",c("Five Year Survival Probability PI "),col="red",lty=c(1,1))

```

### 3.R code for calibration plot:

```

library(rms)
library(foreign)
library(survival)
setwd("C:/R work")

dev<-read.csv("dev.csv")
head(dev)
str(dev)

dev$Age<-factor(dev$Age,labels=c('<=60','60-70','>70'))
dev$Sex<-factor(dev$Sex,labels=c('Female','Male'))
dev$Surgery<-factor(dev$Surgery,labels=c('Lobectomy','Sublobectomy','Pneumonectomy'))
dev$T<-factor(dev$T,labels=c('T1','T2','T3-T4'))
dev$N<-factor(dev$N,labels=c('N0','N1','N2'))
dev$LNR<-factor(dev$LNR,labels=c('<=0.01','>0.01','No Lymph Node Resected'))
dev$Chemotherapy<-factor(dev$Chemotherapy,labels=c('Yes','No/Unknown'))

str(dev)

ddist <- datadist(dev)
options(datadist='ddist')

units(dev$follow) <- "Month"
fcox <- cph(Surv(follow,death) ~ Age + Sex + Surgery + T + N + LNR + Chemotherapy,surv
=T,x=T, y=T,data=dev)

fcox1 <- cph(Surv(follow,death) ~Age + Sex + Surgery + T + N + LNR + Chemotherapy,surv
=T,x=T, y=T,time.inc = 12,data=dev)

```



```

cal1 <- calibrate(fcox1, cmethod="KM", method="boot", u=12, m=250, B=1000)

plot(cal1,col=c("red"))

fcox2 <- cph(Surv(follow,death) ~Age + Sex + Surgery + T + N + LNR + Chemotherapy,surv
=T,x=T, y=T,time.inc = 36,data=dev)

cal2 <- calibrate(fcox2, cmethod="KM", method="boot", u=36, m=250, B=1000)

plot(cal2,col=c("blue"))

fcox2 <- cph(Surv(follow,death) ~Age + Sex + Surgery + T + N + LNR + Chemotherapy,surv
=T,x=T, y=T,time.inc = 60,data=dev)

cal2 <- calibrate(fcox2, cmethod="KM", method="boot", u=60, m=250, B=1000)

plot(cal2,col=c("green"))

vad<-read.csv("vad.csv")

vad$Age<-factor(vad$Age,labels=c('<=60','60-70','>70'))
vad$Sex<-factor(vad$Sex,labels=c('Female','Male'))
vad$Surgery<-factor(vad$Surgery,labels=c('Lobectomy','Sublobectomy','Pneumonectomy'))
vad$T<-factor(vad$T,labels=c('T1','T2','T3-T4'))
vad$N<-factor(vad$N,labels=c('N0','N1','N2'))
vad$LNR<-factor(vad$LNR,labels=c('<=0.01','>0.01','No Lymph Node Resected'))
vad$Chemotherapy<-factor(vad$Chemotherapy,labels=c('Yes','No/Unknown'))

str(vad)

ddist <- datadist(vad)
options(datadist='ddist')

units(vad$follow) <- "Month"

fcox <- cph(Surv(follow,death) ~ Age + Sex + Surgery + T + N + LNR + Chemotherapy,surv
v=T,x=T, y=T,data=vad)

fvad1 <- cph(Surv(follow, death) ~predict(fcox, newdata=vad), x=T, y=T, surv=T, data=vad,
time.inc=12)
cfvad1 <- calibrate(fvad1, cmethod="KM", method="boot", u=12, m=26, B=1000)
plot(cfvad1,col=c("red"))

```

```
fvad2 <- cph(Surv(follow, death) ~predict(fcox, newdata=vad), x=T, y=T, surv=T, data=vad,
time.inc=36)
cfvad2 <- calibrate(fvad2, cmethod="KM", method="boot", u=36, m=26, B=1000)
plot(cfvad2,col=c("blue"))
```

```
fvad2 <- cph(Surv(follow, death) ~predict(fcox, newdata=vad), x=T, y=T, surv=T, data=vad,
time.inc=60)
cfvad2 <- calibrate(fvad2, cmethod="KM", method="boot", u=60, m=26, B=1000)
plot(cfvad2,col=c("green"))
```

#### 4. R code for DCA curve:

```
library(rms)
library(foreign)
library(survival)
setwd("C:/R work")
dev<-read.csv("dev.csv")
head(dev)
str(dev)

dev$Age<-factor(dev$Age,labels=c('<=60','61-70','>70'))
dev$Sex<-factor(dev$Sex,labels=c('Female','Male'))
dev$Surgery<-factor(dev$Surgery,labels=c('Lobectomy','Sublobectomy','Pneumonectomy'))
dev$T<-factor(dev$T,labels=c('T1','T2','T3-T4'))
dev$N<-factor(dev$N,labels=c('N0','N1','N2'))
dev$LNR<-factor(dev$LNR,labels=c('<=0.01','>0.01','No Lymph Node Resected'))
dev$Chemotherapy<-factor(dev$Chemotherapy,labels=c('Yes','No/Unknown'))

str(dev)

ddist <- datadist(dev)
options(datadist='ddist')
units(dev$os) <- "Month"

y<-Surv(dev$os,dev$ status ==1,type="right")
mod1<-coxph(y~ Age + Sex + Surgery + T + N + LNR + Chemotherapy, data=dev)
summary(mod1)

fcox1 <- cph(Surv(os, status) ~ Age + Sex + Surgery + T + N + LNR + Chemotherapy,surv=T,x=T,
y=T,data=dev)
med <- Quantile(fcox1)
nom.sur1 <- nomogram(fcox1, fun=function(x) med(lp=x), funlabel="Median Survival
Time",lp=F)
plot(nom.sur1)
```

```
surv <- Survival(fcox1)
nom1 <- nomogram(fcox1, fun=list(function(x) surv(12, x),
                                function(x) surv(36, x),
                                function(x) surv(60, x)),
                funlabel=c("1-years Survival Probability",
                           "3-years Survival Probability",
                           "5-years Survival Probability"),lp=F)
plot(nom1)
```

```
library(nomogramEx)
nomogramEx(nomo=nom1, np=3, digit=7)
```

**\$RESULT**

[1] "The equation of each variable as follows:"

[[2]]

```
      Age
1  0.00000
2 58.80252
3 100.00000
```

[[3]]

```
      Sex
4  0.00000
5 26.81631
```

[[4]]

```
      Surgery
6  0.00000
7 51.58236
8 62.62947
```

[[5]]

```
      T
9  0.00000
10 31.49101
11 98.07385
```

[[6]]

```
      N
12  0.00000
13 59.69837
14 64.04490
```

[[7]]

LNR

15 0.00000  
16 38.00325  
17 60.68040

[[8]]

Chemotherapy

18 0.00000  
19 59.66232

[[9]]

[1] "1-years Survival Probability = 0 \* points ^3 + -6.5e-06 \* points ^2 + 0.0004805 \* points + 0.8956765"

[[10]]

[1] "3-years Survival Probability = 0 \* points ^3 + -8.3e-06 \* points ^2 + -0.0009098 \* points + 0.8024442"

[[11]]

[1] "5-years Survival Probability = 0 \* points ^3 + -8.9e-06 \* points ^2 + -0.0012152 \* points + 0.7362696"

```
dev$Agepoint<- ifelse(dev$Age=="<=60",0,ifelse(dev$Age=="61-70", 58.80252,100))
dev$Surgerypoint<- ifelse(dev$Surgery=="Lobectomy",0,ifelse(dev$Surgery=="Sublobectomy",
51.58236,62.62947))
dev$Sexpoint<- ifelse(dev$Sex=="Female",0, 26.81631)
dev$Tpoint<- ifelse(dev$T=="T1",0,ifelse(dev$T=="T2", 31.49101,98.07385))
dev$Npoint<- ifelse(dev$N=="N0",0,ifelse(dev$N=="N1", 59.69837,64.04490))
dev$LNRpoint<- ifelse(dev$LNR=="<=0.01",0,ifelse(dev$LNR==">0.01", 38.00325,60.68040))
dev$Chemotherapypoint<- ifelse(dev$Chemotherapy=="Yes",0, 59.66232)
dev$points1 <- dev$Agepoint + dev$Surgerypoint + dev$Sexpoint + dev$Tpoint + dev$Npoint + dev$LNRpoint + dev$Chemotherapypoint
```

```
dev$one.years.Survival.Probabilitynew1 = c(summary(survfit(mod1,newdata=dev),times=12)$surv)
```

```
dev$one.years.death.Probabilitynew1 =1- dev$one.years.Survival.Probabilitynew1
```

```
dev$three.years.Survival.Probabilitynew1 = c(summary(survfit(mod1,newdata=dev),times=36)$surv)
```

```
dev$three.years.death.Probabilitynew1 =1- dev$three.years.Survival.Probabilitynew1
```

```
dev$five.years.Survival.Probabilitynew1 = c(summary(survfit(mod1,newdata=dev),times=60)$s  
urv)
```

```
dev$five.years.death.Probabilitynew1 =1- dev$five.years.Survival.Probabilitynew1
```

```
y<-Surv(dev$os,dev$ status ==1,type="right")  
mod2<-coxph(y~ T + N , data=dev)  
summary(mod2)
```

```
fcox2 <- cph(Surv(os, status) ~T+N,surv=T,x=T, y=T,data=dev)  
med <- Quantile(fcox2)
```

```
nom.sur2 <- nomogram(fcox2, fun=function(x) med(lp=x), funlabel="Median Survival Time",  
lp=F)  
plot(nom.sur2)
```

```
surv <- Survival(fcox2)  
nom2 <- nomogram(fcox2, fun=list(function(x) surv(12, x),  
function(x) surv(36, x),  
function(x) surv(60, x)),  
funlabel=c("1-years Survival Probability",  
"3-years Survival Probability",  
"5-years Survival Probability"),lp=F)  
plot(nom2)
```

```
library(nomogramEx)  
nomogramEx(nomo=nom2, np=3, digit=2)
```

**\$RESULT**

**[1] "The equation of each variable as follows:"**

**[[2]]**

**T**  
**1 0**  
**2 0**  
**3 0**

**[[3]]**

**N**  
**4 0**  
**5 0**  
**6 100**

**[[4]]**

```
[1] "1-years Survival Probability = 0 * points ^3 + 0 * points ^2 + 0 * points + 0.89"
```

```
[[5]]
```

```
[1] "3-years Survival Probability = 0 * points ^3 + 0 * points ^2 + 0 * points + 0.71"
```

```
[[6]]
```

```
[1] "5-years Survival Probability = 0 * points ^3 + 0 * points ^2 + 0 * points + 0.65"
```

```
dev$Tpoint<- ifelse(dev$T=="T1",0,ifelse(dev$T=="T2", 0,0))
dev$Npoint<- ifelse(dev$N=="N0",0,ifelse(dev$N=="N1", 0,100))
dev$points2 <- dev$Tpoint + dev$Npoint
```

```
dev$one.years.Survival.Probabilitynew2 = c(summary(survfit(mod2,newdata=dev),times=12)$surv)
```

```
dev$one.years.death.Probabilitynew2 =1- dev$one.years.Survival.Probabilitynew2
```

```
dev$three.years.Survival.Probabilitynew2 = c(summary(survfit(mod2,newdata=dev),times=36)$surv)
```

```
dev$three.years.death.Probabilitynew2 =1- dev$three.years.Survival.Probabilitynew2
```

```
dev$five.years.Survival.Probabilitynew2 = c(summary(survfit(mod2,newdata=dev),times=60)$surv)
```

```
dev$five.years.death.Probabilitynew2 =1- dev$five.years.Survival.Probabilitynew2
```

```
source("stdca.R")
```

```
stdca(data=dev,outcome="status",ttoutcome="os",timepoint=12,
predictors=c("one.years.death.Probabilitynew1",
"one.years.death.Probabilitynew2"),smooth=TRUE ,probability=c("TRUE", "TRUE"))
stdca(data=dev,outcome="status",ttoutcome="os",timepoint=36,
predictors=c("three.years.death.Probabilitynew1",
"three.years.death.Probabilitynew2"),smooth=TRUE ,probability=c("TRUE", "TRUE"))
stdca(data=dev,outcome="status",ttoutcome="os",timepoint=60,
predictors=c("five.years.death.Probabilitynew1",
"five.years.death.Probabilitynew2"),smooth=TRUE ,probability=c("TRUE", "TRUE"))
```

```
stdca(data=dev,outcome="status",ttoutcome="os",timepoint=12, predictors=c("points1",
"points2"),smooth=TRUE ,probability=c("FALSE", "FALSE"))
```

## 5.R code for K-M curve and logrank test

```

library(rms)
library(foreign)
library(survival)
library(nricens)
setwd("C:/R work")
devnew<-read.csv("devnew.csv")
head(devnew)
str(devnew)
library("survival")
fit <- survfit(Surv(follow,death)
~ PI, data = devnew)
class(fit)
library("survminer")
ggsurvplot(fit, data = devnew)

ggsurvplot(fit, data = devnew, fun = "event")
ggsurvplot(fit, data = devnew, fun = "cumhaz")

ggsurvplot(fit, data = devnew, conf.int = TRUE, pval = TRUE, fun = "pct", risk.table = TRUE,
size = 1, linetype = "strata", palette = c("#E7B800", "#2E9FDF"), legend = "bottom",legend.title =
"PI",legend.labs = c("high risk","low risk"))

```

```

library(rms)
library(foreign)
library(survival)
library(nricens)
setwd("C:/R work")
vadnew<-read.csv("vadnew.csv")
head(vadnew)
str(vadnew)
library("survival")
fit <- survfit(Surv(follow,death)
~ PI, data = vadnew)
class(fit)
library("survminer")
ggsurvplot(fit, data = vadnew)

ggsurvplot(fit, data = vadnew, fun = "event")
ggsurvplot(fit, data = vadnew, fun = "cumhaz")

ggsurvplot(fit, data = vadnew, conf.int = TRUE, pval = TRUE, fun = "pct", risk.table = TRUE,
size = 1, linetype = "strata", palette = c("#E7B800", "#2E9FDF"), legend = "bottom",legend.title =
"PI",legend.labs = c("high risk","low risk"))

```

## 6.R code for IDI

```

library(rms)
library(foreign)
library(survival)
library(nricens)

setwd("C:/R work")

dev<-read.csv("dev.csv")
head(dev)
str(dev)

dev$Age<-factor(dev$Age,labels=c('<=60','60-70','>70'))
dev$Sex<-factor(dev$Sex,labels=c('Female','Male'))
dev$Surgery<-factor(dev$Surgery,labels=c('Lobectomy','Sublobectomy','Pneumectomy'))
dev$T<-factor(dev$T,labels=c('T1','T2','T3-T4'))
dev$N<-factor(dev$N,labels=c('N0','N1','N2'))
dev$LNR<-factor(dev$LNR,labels=c('<=0.01','>0.01','No Lymph Node Resected'))
dev$Chemotherapy<-factor(dev$Chemotherapy,labels=c('Yes','No/Unknown'))

str(dev)

mstd=coxph(Surv(dev$follow,dev$death==1)~T + N,x=TRUE,data=dev)

mnew=coxph(Surv(dev$follow,dev$death==1)~ Age + Sex + Surgery + T + N + LNR +
Chemotherapy,x=TRUE,data=dev)

Srv=Surv(dev$follow,dev$death)

dev$oldone.years.Survival.Probability = c(1-
(summary(survfit(mstd,newdata=dev),times=12)$surv))
dev$newone.years.Survival.Probability = c(1-
(summary(survfit(mnew,newdata=dev),times=12)$surv))

devevent<-dev[dev$death==1,]
devnonevent<-dev[dev$death==0,]

IDIEvent<- devevent$newone.years.Survival.Probability -
devevent$oldone.years.Survival.Probability
IDInonevent<- devnonevent$newone.years.Survival.Probability -
devnonevent$oldone.years.Survival.Probability

mean(IDIEvent)
[1] 0.02302352
mean(IDInonevent)

```



[1] -0.02718314

IDI= mean(IDIevent)- mean(IDInonevent)

IDI

[1] 0.05020666

SEevent = sd(IDIevent)/sqrt(length(IDIevent))

SEnonevnt = sd(IDInonevent)/sqrt(length(IDInonevent))

Z = IDI/sqrt(SEevent\*SEevent + SEnonevnt\*SEnonevnt )

Z

[1] 9.204749

P= 1- pnorm(Z)

P

[1] 0

dev\$oldthree.years.Survival.Probability = c(1-

(summary(survfit(mstd,newdata=dev),times=36)\$surv))

dev\$newthree.years.Survival.Probability = c(1-

(summary(survfit(mnew,newdata=dev),times=36)\$surv))

devevent<-dev[dev\$death==1,]

devnonevent<-dev[dev\$death==0,]

IDIevent<- devevent\$newthree.years.Survival.Probability -

devevent\$oldthree.years.Survival.Probability

IDInonevent<- devnonevent\$newthree.years.Survival.Probability -

devnonevent\$oldthree.years.Survival.Probability

mean(IDIevent)

[1] 0.0292221

mean(IDInonevent)

[1] -0.05058821

IDI= mean(IDIevent)- mean(IDInonevent)

IDI

[1] 0.07981032

SEevent = sd(IDIevent)/sqrt(length(IDIevent))

SEnonevnt = sd(IDInonevent)/sqrt(length(IDInonevent))

Z = IDI/sqrt(SEevent\*SEevent + SEnonevnt\*SEnonevnt )

Z

[1] 8.894716

P= 1- pnorm(Z)

P

[1] 0

dev\$oldfive.years.Survival.Probability = c(1-

(summary(survfit(mstd,newdata=dev),times=60)\$surv))

```
dev$newfive.years.Survival.Probability = c(1-
(summary(survfit(mnew,newdata=dev),times=60)$surv))
```

```
devevent<-dev[dev$death==1,]
devnonevent<-dev[dev$death==0,]
```

```
IDIevent<- devevent$newfive.years.Survival.Probability -
devevent$oldfive.years.Survival.Probability
IDInonevent<- devnonevent$newfive.years.Survival.Probability -
devnonevent$oldfive.years.Survival.Probability
```

```
mean(IDIevent)
[2] 0.02560333
```

```
mean(IDInonevent)
[2] -0.05282392
```

```
IDI= mean(IDIevent)- mean(IDInonevent)
```

```
IDI
[2] 0.07842724
```

```
SEevent = sd(IDIevent)/sqrt(length(IDIevent))
```

```
SEnonevnt = sd(IDInonevent)/sqrt(length(IDInonevent))
```

```
Z = IDI/sqrt(SEevent*SEevent + SEnonevnt*SEnonevnt )
```

```
Z
[2] 8.604544
```

```
P= 1- pnorm(Z)
```

```
P
[1] 0
```

| Year       | IDI   | p value |
|------------|-------|---------|
| One-year   | 0.050 | < 0.001 |
| Three-year | 0.080 | < 0.001 |
| Five-year  | 0.078 | < 0.001 |
