# Supplementary material for: Development and validation of a prognostic model of resectable small-cell lung cancer: a large population-based cohort study and external validation
Source: Springer Nature journal article supplement (doi:10.1186/s12967-020-02412-x), 2020-06-15

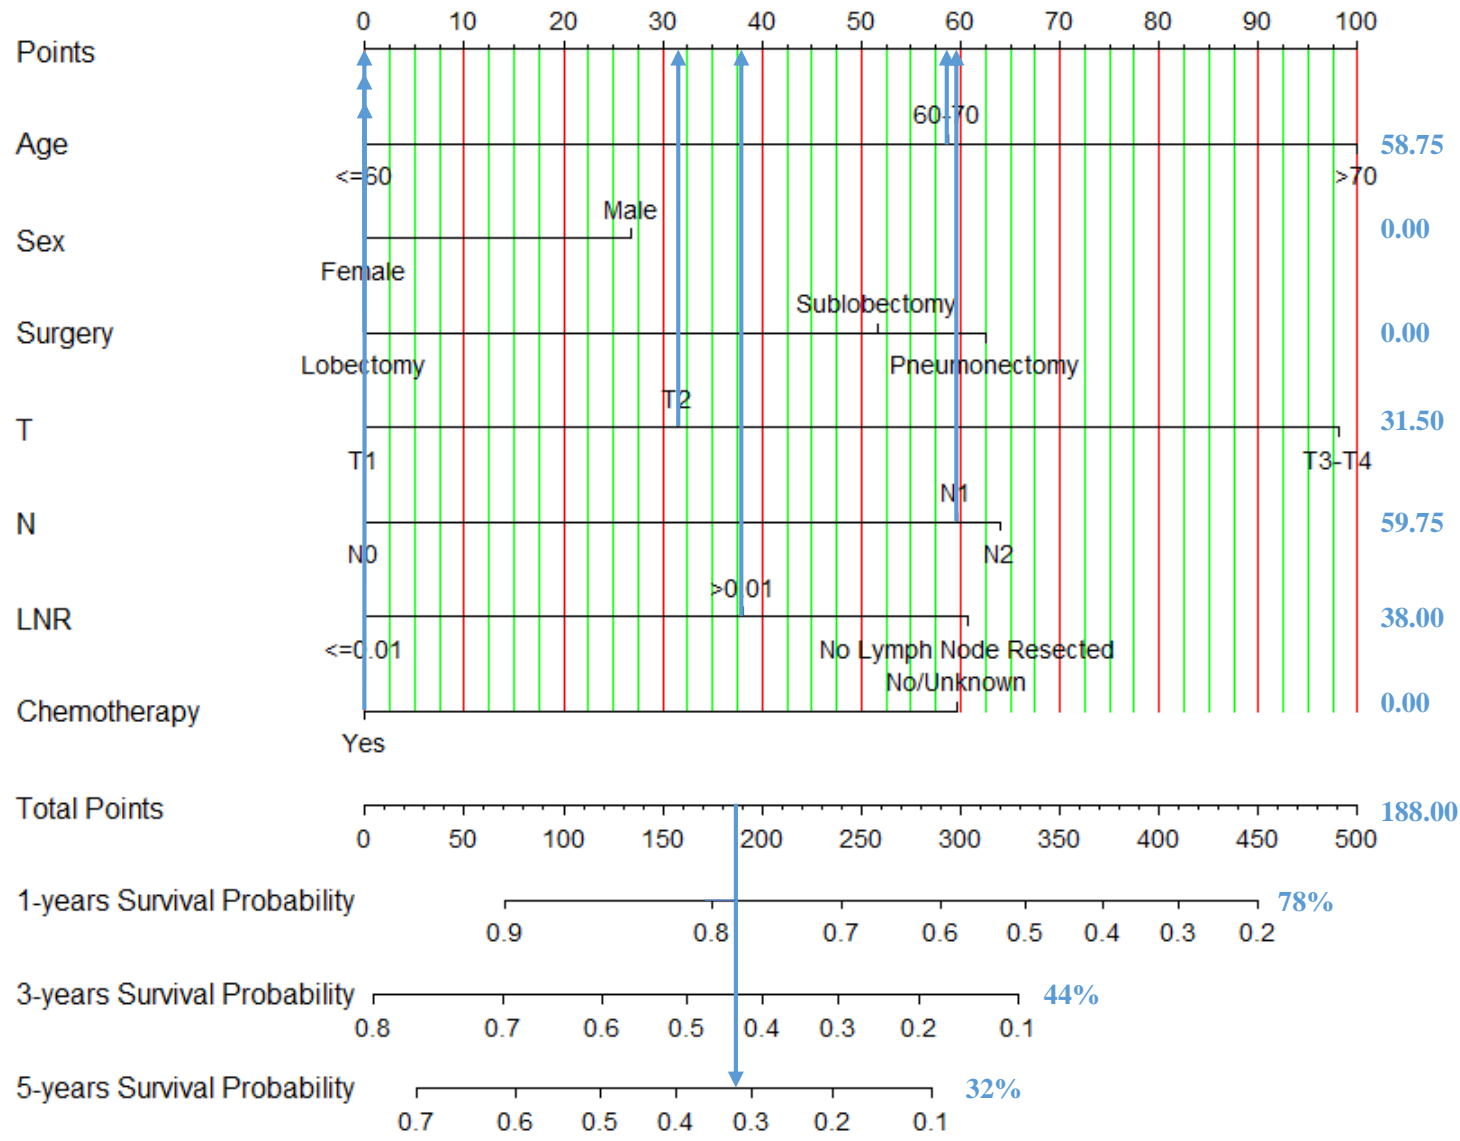

Supplement: MOESM4 [file 18084514]
